# Supplementary material
Source: MDPI journal article supplement (https://www.mdpi.com/1996-1073/15/21/8315)
Supplement: s1 [file s1]

### Supplementary Information

Table S1. Average EDX table of element distribution in LSNF sample.

| Z  | Element | Family | Atomic Fraction (%) | Atomic Error (%) | Mass Fraction (%) | Mass Error (%) | Fit error (%) |
|----|---------|--------|---------------------|------------------|-------------------|----------------|---------------|
| 8  | O       | K      | 41,99               | 3,8              | 11,38             | 0,67           | 0.10          |
| 26 | Fe      | K      | 11,87               | 1,84             | 10,8              | 1,57           | 0.10          |
| 28 | Ni      | K      | 12,21               | 2,08             | 12,84             | 1,87           | 0.03          |
| 38 | Sr      | L      | 16,96               | 2,62             | 24,51             | 3,5            | 0.01          |
| 57 | La      | L      | 17,11               | 2,43             | 40,47             | 4,98           | 0.14          |

Table S2. Specific surface area for samples obtained using USP method.

| Sample | $S_{\text{BET}}$ , $\text{m}^2 \text{g}^{-1}$ |
|--------|-----------------------------------------------|
| LSNF   | 6.9                                           |
| LSCN   | 6.8                                           |
| LSCF   | 6.9                                           |

Table S3. Texture coefficient for LSNF sample.

| $(h\ k\ l)$ | $2\theta$ | $d\ (\text{\AA})$ | $I/I_0$ | $TC$      |
|-------------|-----------|-------------------|---------|-----------|
| (1 0 1)     | 24.25     | 3.6601            | 0.3816  | 0.9992(2) |
| (1 0 3)     | 31.56     | 2.8322            | 1       | 0.9987(1) |
| (1 1 0)     | 33.11     | 2.7038            | 0.8697  | 1.0023(2) |
| (2 0 0)     | 47.46     | 1.9119            | 0.5029  | 0.9996(3) |

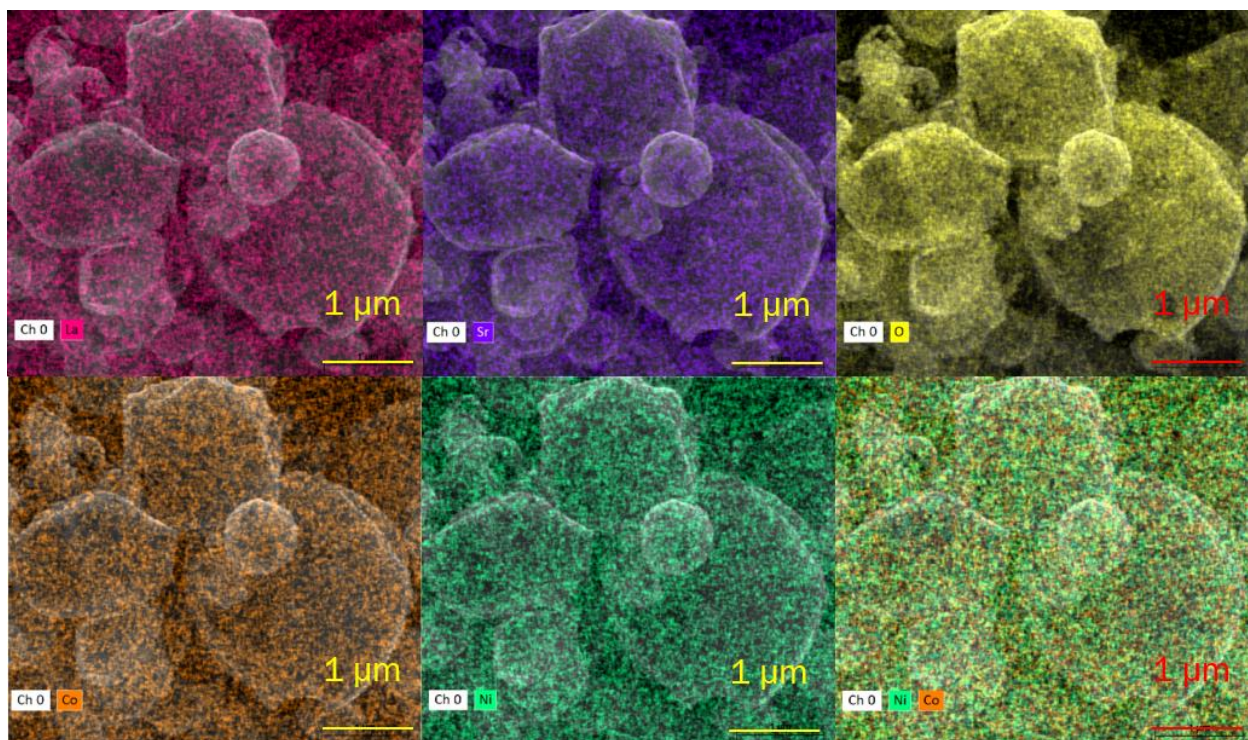

Figure S1. SEM-EDX elements distribution in LSCN sample obtained using USP method.

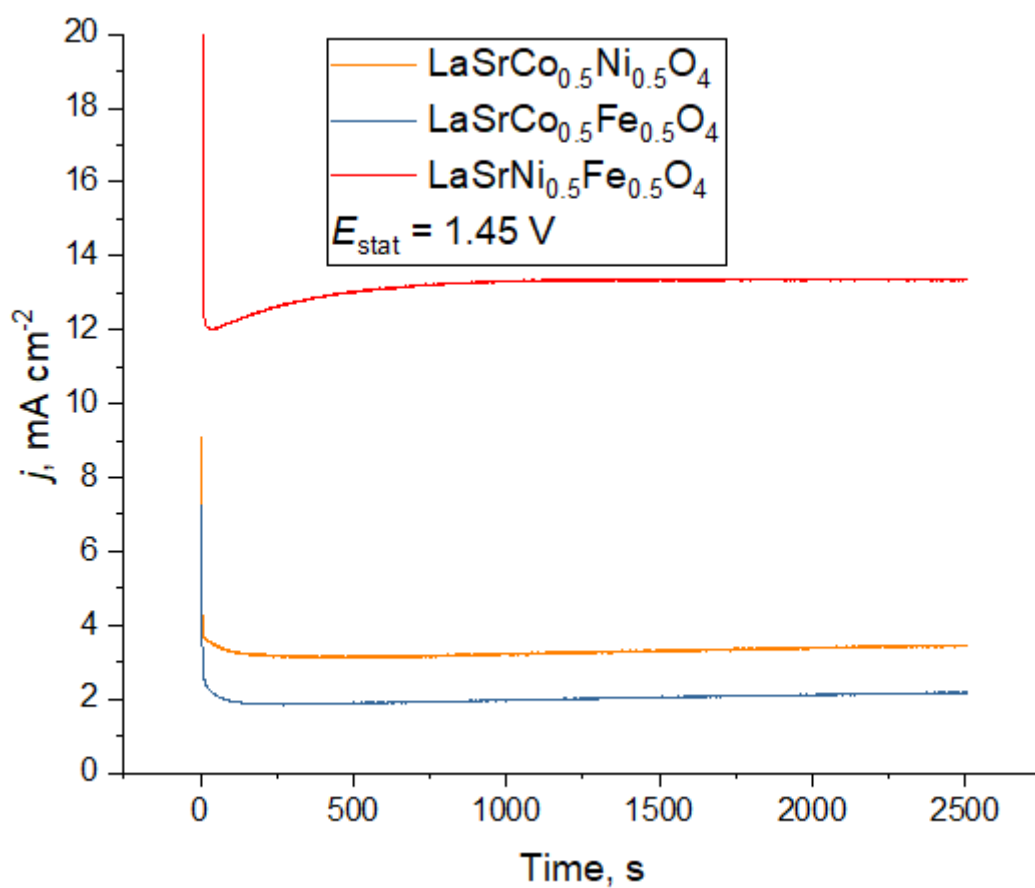

Figure S2. Chronoamperometry of samples obtained via USP method in OER.

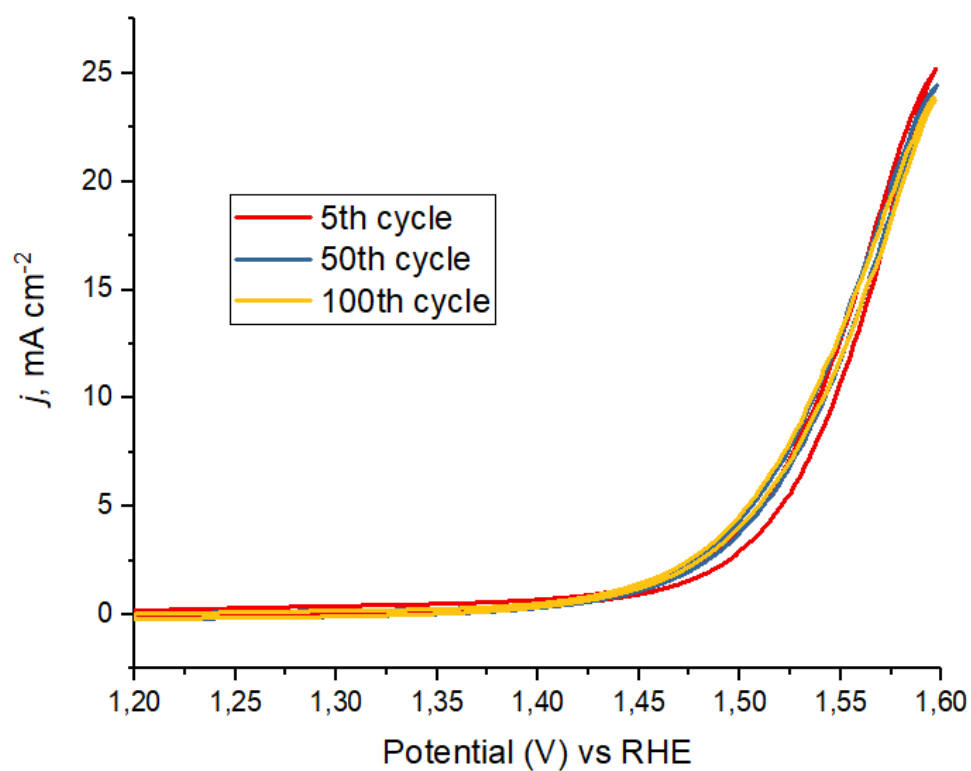

Figure S3. Stability tests of LSCF sample during 100 cycles in range of potentials from 1.2 to 1.58 V vs RHE at scan rate  $20 \text{ mV s}^{-1}$ .

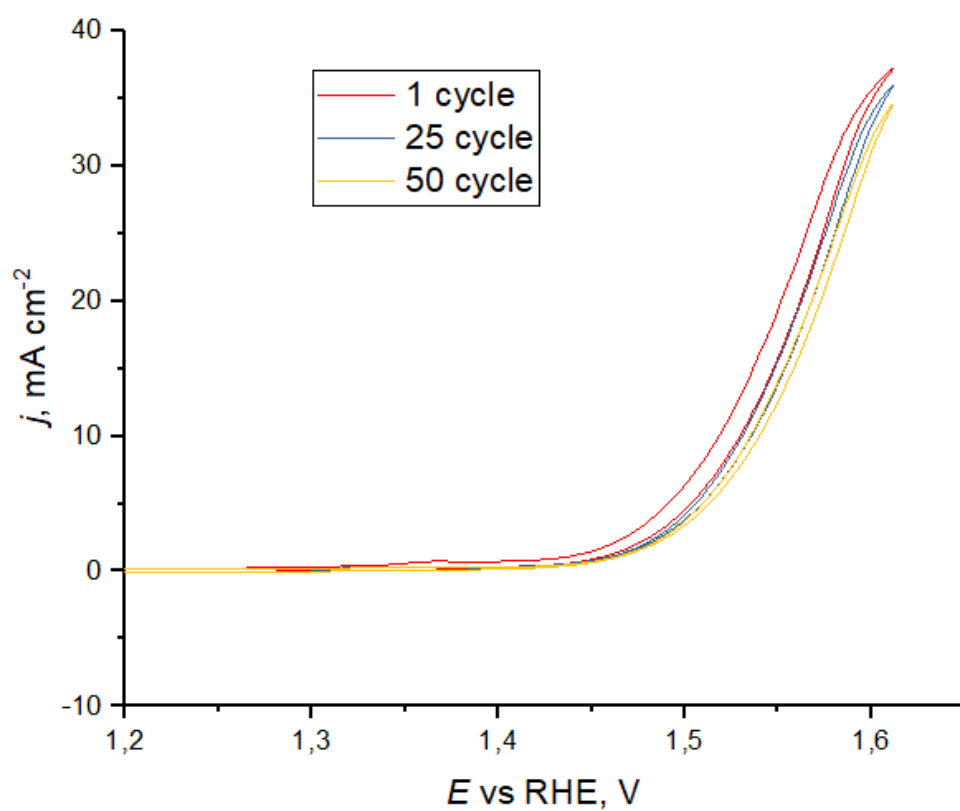

Figure S4. Stability tests of LSCN sample during 50 cycles in range of potentials from 1.2 to 1.6 V vs RHE at scan rate  $10 \text{ mV s}^{-1}$ .

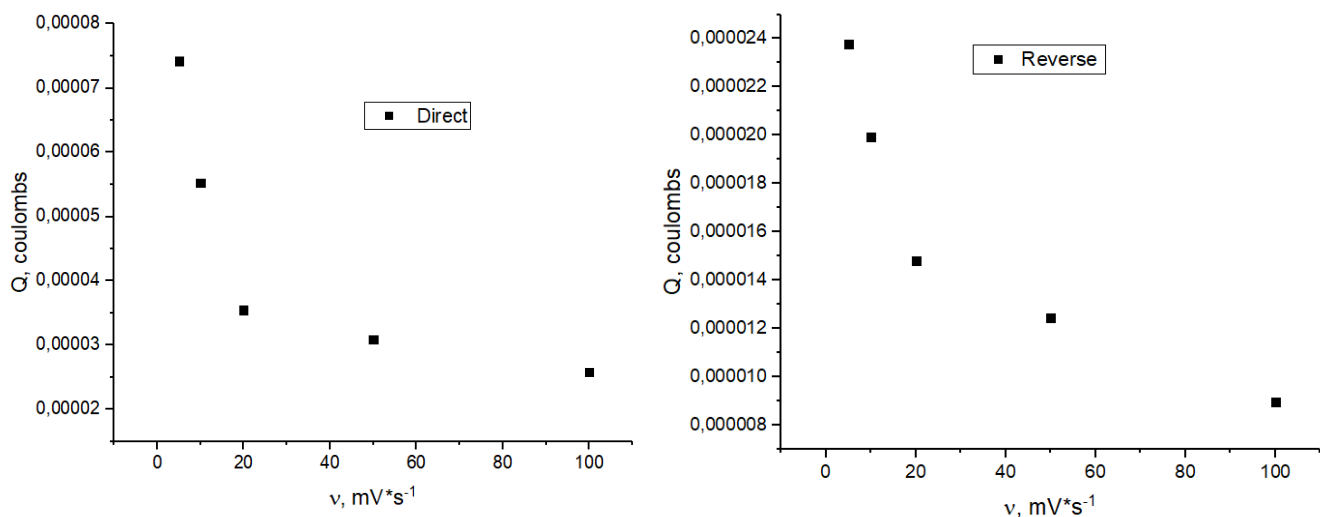

Figure S5. Dependence of anodic and cathodic charge for Ni redox from scan rate (5 – 100 mV s<sup>-1</sup>) in LSNF sample.

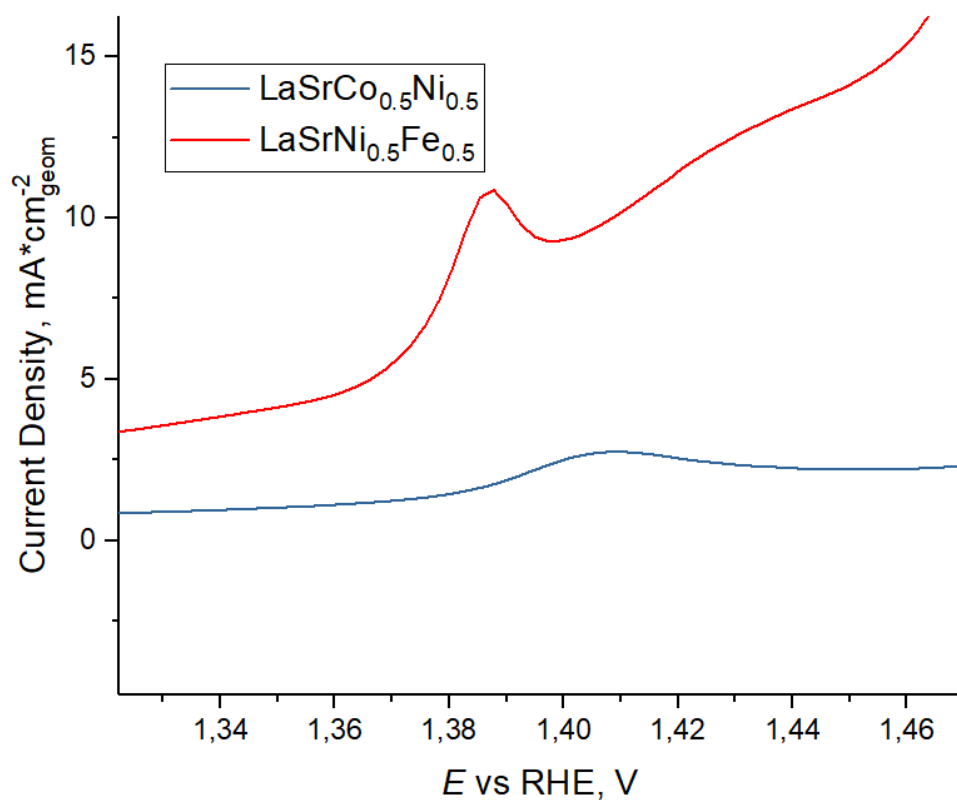

Figure S6. Oxidation peak of Ni<sup>2+</sup>/Ni<sup>3+</sup> at anodic cyclic voltammetry curve (2<sup>nd</sup> cycle) for LSNF and LSCN.
